# Supplementary material for: Grizzly Bear Noninvasive Genetic Tagging Surveys: Estimating the Magnitude of Missed Detections
Source: PLoS One. 2016 Sep 7;11(9):e0161055. doi: 10.1371/journal.pone.0161055 (PMC5014381; doi:10.1371/journal.pone.0161055)
Supplement: S1 Table — For each survey session (month) 1–8, a bear was either detected (1) or undetected (0) at a hair trap (H) and a camera trap (C). (XLSX) [file pone.0161055.s001.xlsx]

## Sheet: 2012
Cell#	C1	H1	C2	H2	C3	H3	C4	H4	C5	H5	C6	H6	C7	H7	C8	H8
1	0	0	0	0	0	.	0	0	.	.	.	.	0	.	0	.
10	0	.	0	0	0	0	1	.	.	0	0	.	0	.	0	0
10 NE	.	.	.	.	.	.	1	1	1	1	0	.	0	0	0	0
10 NW	.	.	.	.	.	.	0	.	1	1	0	.	0	0	0	.
10 SW	.	.	.	.	.	.	1	1	0	.	1	1	0	.	0	0
10-A	0	.	1	.	1	0	0	.	1	1	0	0	0	.	0	0
11	0	.	1	1	1	1	.	0	0	.	0	0	0	.	0	0
11 NE	.	.	.	.	.	.	1	1	0	0	0	.	1	1	0	0
11 NW	.	.	.	.	.	.	0	0	0	0	1	1	0	.	0	0
11 SE	.	.	.	.	.	.	0	.	.	1	.	1	0	.	0	0
12	0	.	0	0	0	.	.	0	0	0	0	0	0	0	0	0
13	1	1	1	0	0	0	0	0	0	0	0	0	0	0	0	0
14	0	0	0	.	0	.	0	0	0	.	0	.	0	0	0	0
16	0	0	0	.	1	1	.	1	0	.	0	.	.	.	.	.
17	0	.	0	.	0	.	1	1	1	1	0	.	0	0	0	.
17 NW	.	.	.	.	.	.	0	0	1	1	1	1	0	.	0	.
17 SE	.	.	.	.	.	.	1	1	1	1	1	1	1	.	0	0
17 SW	.	.	.	.	.	.	1	0	1	1	0	1	0	.	.	.
18	0	.	0	.	0	0	0	0	0	0	0	0	0	0	0	0
19	1	0	1	0	0	0	0	0	0	0	0	0	0	0	0	0
2-A	0	.	1	1	.	.	.	.	.	.	.	.	.	.	.	.
2	0	.	0	0	0	0	0	0	0	0	0	.	0	.	0	0
20	0	0	1	0	0	.	1	1	0	.	0	0	0	0	0	0
21	1	1	0	0	0	.	.	0	1	1	1	0	.	0	.	0
22	.	0	.	0	.	.	0	0	0	0	0	0	.	.	.	.
23	1	.	1	0	0	0	1	1	.	.	.	.	0	0	.	0
24	1	1	1	1	0	0	0	0	1	0	1	1	.	0	.	0
25	1	0	1	1	1	1	1	0	1	1	1	1	1	1	.	1
26	1	1	0	.	0	.	.	.	0	.	0	0	.	0	.	0
27	1	1	1	1	1	1	1	1	0	0	0	.	.	.	.	.
27-A	0	0	1	1	0	0	1	0	0	0	0	0	0	0	0	0
28	1	1	1	0	0	0	0	0	0	0	.	.	.	.	.	.
29	0	0	1	.	0	.	1	1	.	.	0	0	0	0	0	0
3	1	0	0	.	0	.	1	0	0	0	0	0	0	0	0	.
31	1	0	0	0	0	0	0	0	0	0	.	.	.	.	.	.
32	0	.	0	.	0	0	0	0	0	0	.	.	.	.	.	.
33	0	.	0	0	0	0	0	0	0	0	.	.	.	.	.	.
34	0	.	0	.	1	0	1	0	0	.	.	.	.	.	.	.
4	0	.	0	.	.	.	0	.	0	.	0	.	0	.	0	.
5	0	.	0	.	0	.	0	.	1	1	0	.	.	.	0	0
5 NE	.	.	.	.	.	.	0	0	1	1	1	1	0	.	0	.
5 NW	.	.	.	.	.	.	0	0	1	0	0	0	0	0	0	.
6	0	.	0	.	.	.	0	.	0	.	.	.	0	.	0	0
6 NE	.	.	.	.	.	.	0	0	0	0	0	0	0	0	0	0
6 NW	.	.	.	.	.	.	.	0	0	0	1	0	0	0	0	0
6 SW	.	.	.	.	.	.	0	0	0	0	0	0	0	.	0	0
5 SE	.	.	.	.	.	.	.	0	1	0	.	.	.	.	.	.
7	1	1	0	0	0	.	0	0	0	0	0	0	.	0	0	.
8	0	.	0	.	0	0	0	0	0	0	0	0	0	0	0	0
9	0	0	0	0	.	0	0	0	.	.	0	0	0	0	0	.

## Sheet: 2013
Cell#	C1	H1	C2	H2	C3	H3	C4	H4	C5	H5	C6	H6	C7	H7	C8	H8
Cell 1 SW 2013	0	.	0	.	0	.	0	.	0	.	0	0	1	1	0	0
Cell 10 SE 2013	0	0	.	.	0	.	0	.	0	.	0	.	0	.	0	.
Cell 11 NW 2013	0	0	0	.	0	0	.	.	0	.	0	0	0	0	0	0
Cell 11 SW 2013	.	0	0	0	0	0	1	1	0	0	0	0	0	0	0	0
Cell 12 2013	0	0	0	0	0	0	0	0	0	0	0	0	0	0	0	0
Cell 13 2013	0	0	0	.	0	0	0	0	0	0	0	0	0	0	0	0
Cell 14 2013	0	0	0	0	0	0	0	0	1	0	0	0	0	0	0	0
Cell 15 2013	.	.	0	0	0	.	0	.	0	.	0	.	0	.	0	.
Cell 15-A 2013	.	.	.	.	0	0	1	0	0	.	0	0	0	0	0	0
Cell 16 2013	.	.	0	.	0	.	0	.	0	0	0	.	0	.	0	.
Cell 17 NW 2013	.	.	1	1	1	1	.	1	0	.	0	0	1	0	1	.
Cell 17 SE 2013	0	0	0	0	1	1	1	1	0	0	1	1	1	1	0	0
Cell 17 SW 2013	0	0	0	0	0	0	0	0	0	0	0	0	0	0	0	0
Cell 18 NE 2013	0	0	1	0	0	.	1	.	0	0	1	0	0	0	0	0
Cell 18 NW 2013	.	.	.	.	.	.	.	.	1	1	1	1	0	0	0	0
Cell 18 SE 2013	0	.	1	.	1	1	1	.	1	1	0	0	0	0	0	0
Cell 18 SSE 2013	.	0	0	.	1	1	1	1	0	0	1	.	1	.	0	0
Cell 19 NW 2013	0	0	0	0	1	.	0	.	0	.	1	1	1	.	0	0
Cell 2 SW 2013	0	0	0	.	0	.	0	.	0	.	0	0	0	.	0	0
Cell 20 2013	0	0	0	0	0	0	0	0	0	0	0	0	0	0	0	0
Cell 21 2013	.	.	0	0	0	0	0	.	0	0	0	0	0	0	0	0
Cell 22 2013	0	0	0	0	0	0	0	0	0	0	0	.	0	.	0	0
Cell 23 2013	.	.	0	0	0	0	.	1	1	1	0	.	0	.	0	.
Cell 24 2013	.	.	.	.	.	.	1	0	0	.	0	.	0	.	0	.
Cell 25 NE 2013	.	0	1	1	.	1	1	1	1	1	0	0	1	1	1	1
Cell 25 SE 2013	0	0	0	0	1	1	0	.	0	0	1	1	.	0	.	0
Cell 26 NE 2013	0	0	0	0	1	.	1	.	0	.	1	.	1	.	0	.
Cell 26 NNW 2013	0	0	0	0	1	1	0	.	0	0	.	1	0	0	0	0
Cell 26 NW 2013	0	0	1	1	1	1	.	1	1	1	1	.	0	0	0	0
Cell 27 NW 2013	0	.	1	1	1	1	1	1	1	1	1	1	1	1	1	1
Cell 28 2013	0	.	0	.	0	.	0	.	0	.	0	.	0	.	0	.
Cell 29 2013	0	0	0	0	0	0	0	0	0	0	0	0	0	0	0	0
Cell 3 NE 2013	0	.	0	.	0	0	0	0	0	.	0	.	0	0	0	0
Cell 3 NW 2013	.	.	0	0	0	.	0	.	0	.	0	0	0	0	0	0
Cell 30 2013	0	.	0	.	0	.	0	0	1	1	1	0	0	0	1	1
Cell 31 2013	0	0	0	0	0	0	1	.	1	1	0	.	0	.	1	1
Cell 32 2013	0	0	0	0	0	0	0	0	0	.	0	0	0	0	0	0
Cell 33 NE 2013	0	0	0	0	1	1	1	0	1	1	1	1	0	.	0	0
Cell 33 SE 2013	.	.	.	.	1	1	0	0	0	.	0	0	1	1	.	1
Cell 33 SW 2013	.	.	.	.	.	.	.	.	.	.	1	1	.	1	.	1
Cell 34 N 2013	0	0	0	0	1	1	1	1	0	0	0	0	.	1	0	.
Cell 34 NW 2013	0	.	.	0	.	1	0	0	1	1	1	1	1	1	0	0
Cell 34 SE 2013	1	0	1	1	1	0	1	1	1	1	1	1	1	1	0	0
Cell 35 2013	.	.	.	.	.	.	1	1	1	1	.	1	1	1	0	0
Cell 37 2013	0	.	1	0	0	0	1	1	0	.	1	0	0	0	0	.
Cell 38 2013	0	0	0	.	0	.	0	0	1	1	.	1	.	1	1	1
Cell 39 2013	0	0	.	1	1	1	.	0	1	1	1	1	.	0	0	0
Cell 4 2013	0	0	0	0	0	.	0	0	0	.	0	0	0	0	1	0
Cell 40 NE 2013	.	.	.	.	0	0	1	0	0	0	0	0	1	1	.	1
Cell 41 N 2013	0	0	0	.	0	0	0	0	0	0	0	.	0	.	0	0
Cell 41 NW 2013	0	.	0	0	0	0	0	0	0	0	0	.	1	0	0	.
Cell 42 NW 2013	.	.	.	.	.	.	0	0	0	0	0	0	0	0	0	0
Cell 43 2013	.	.	0	0	0	0	0	0	0	0	0	0	0	0	0	0
Cell 44 2013	0	0	0	.	0	.	0	0	0	.	0	.	0	0	0	.
Cell 45 2013	.	0	0	.	0	.	0	.	0	0	1	0	0	.	0	0
Cell 47 2013	0	0	1	0	0	.	1	1	0	0	1	0	0	0	0	.
Cell 48 2013	.	.	1	1	1	1	.	1	0	.	0	0	0	.	0	0
Cell 49 2013	.	.	1	1	1	1	1	1	1	1	1	1	1	1	0	0
Cell 5 2013	0	.	0	0	0	.	0	0	0	.	0	.	0	0	0	.
Cell 50 2013	.	.	1	0	1	0	1	1	0	.	0	0	0	0	0	0
Cell 51 2013	0	0	1	0	0	0	0	0	0	.	1	1	.	1	0	0
Cell 52 2013	0	0	1	1	1	.	1	0	0	0	1	1	1	1	1	1
Cell 53 2013	1	1	0	0	0	.	0	0	0	0	0	.	1	0	0	0
Cell 54 2013	0	.	0	.	0	.	0	0	1	1	0	.	0	.	0	0
Cell 55 2013	0	0	1	0	0	0	0	0	0	0	0	.	0	.	0	0
Cell 56 2013	1	1	0	0	0	0	0	.	.	0	1	1	1	1	1	.
Cell 57 2013	1	1	0	.	0	.	0	0	0	0	0	0	1	1	0	.
Cell 58 2013	.	.	.	.	.	.	0	0	1	1	.	1	1	1	0	0
Cell 59 2013	1	1	0	0	1	1	0	.	0	.	1	1	.	1	0	0
Cell 6 2013	0	.	0	0	0	.	0	.	0	.	0	.	0	0	0	0
Cell 60 2013	0	0	1	1	0	.	0	.	1	1	0	.	0	.	0	0
Cell 61 2013	1	1	0	.	0	.	0	.	0	.	0	.	0	.	0	0
Cell 7 2013	0	0	0	0	0	.	1	.	0	.	0	.	1	1	0	0
Cell 9 NW 2013	0	0	0	0	0	0	0	0	0	0	0	0	0	0	0	0
Cell 9 SE 2013	0	0	0	0	0	0	0	.	1	1	1	0	1	1	0	0
Cell 9 SW 2013	.	.	0	0	1	0	0	0	0	.	0	0	0	.	0	.

## Sheet: Metadata
C1	camera presence (1) or absence (0), session 1
H1	hair presence (1) or absence (0), session 1
.	missing data / data not collected
